# Supplementary material for: Evolutionary loss of melanogenesis in the tunicate Molgula occulta
Source: PubMed Central journal article supplement (PMC5516394; doi:10.1186/s13227-017-0074-x), 2017-07-18

## Table

| <b>Gastrula</b>     |                    |                            |
|---------------------|--------------------|----------------------------|
| <b>Tyr sequence</b> | <b>Length (bp)</b> | <b>hybrid reads mapped</b> |
| occulta (NY1)       | 764                | 1                          |
| occulta (NP1)       | 639                | 0                          |
| occulta (NP2)       | 230                | 0                          |
| oculata             | 2067               | 164                        |
| <b>Neurula</b>      |                    |                            |
| <b>Tyr sequence</b> | <b>Length (bp)</b> | <b>hybrid reads mapped</b> |
| occulta (NY1)       | 764                | 0                          |
| occulta (NP1)       | 639                | 0                          |
| occulta (NP2)       | 230                | 0                          |
| oculata             | 2067               | 70                         |
| <b>Tailbud</b>      |                    |                            |
| <b>Tyr sequence</b> | <b>Length (bp)</b> | <b>hybrid reads mapped</b> |
| occulta (NY1)       | 764                | 2                          |
| occulta (NP1)       | 639                | 0                          |
| occulta (NP2)       | 230                | 0                          |
| oculata             | 2067               | 215                        |

## Figure

*Molgula oculata*

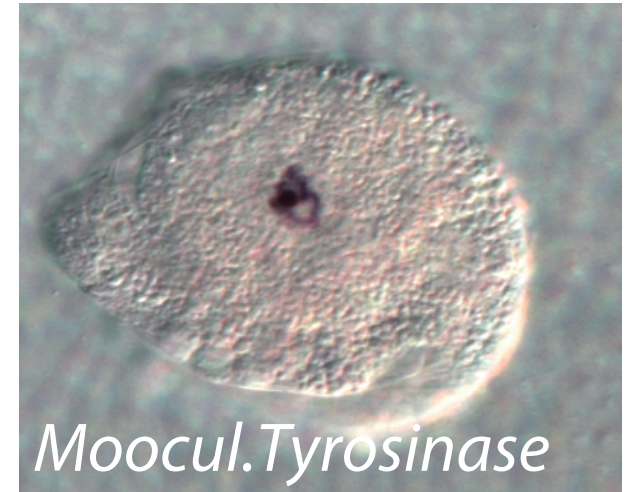

Supplement: 13227_2017_74_MOESM1_ESM.pdf [file 13227_2017_74_MOESM1_ESM.pdf]
