# Supplementary material for: Evolutionary loss of melanogenesis in the tunicate Molgula occulta
Source: PubMed Central journal article supplement (PMC5516394; doi:10.1186/s13227-017-0074-x), 2017-07-18
Supplement: 13227_2017_74_MOESM2_ESM.pdf [file 13227_2017_74_MOESM2_ESM.pdf]

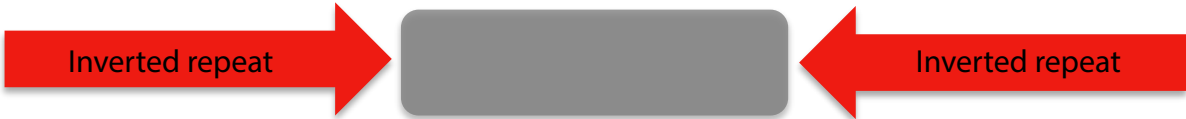

NP1 accacagattaagaatacgtccagatagcttacttcataggaattgtatggttctcaaac  
 NY1 accacagattaagaatacgtccagatagcttacttcataggaattgtatggttctcaaac  
 \*\*\*\*\*

NP1 gttatggtccagtgaccacatgggcgaaaatcatagaaatcaaaagttacatctcatgcc  
 NY1 gttatggtccagtgaccacatgggcgaaaatcatagaaatcaaaagttacatctcatgcc  
 \*\*\*\*\*

NP1 agaaacacttatttctgtcattatctctcacaaaacttaaatataaatttaaactgagct  
 NY1 agaaaaacttatttctgtcattatctctcacaaaacttaaatataaatttaaactgagct  
 \*\*\*\*\*

NP1 gttttattccaatcaaactgcatatacagcaacctgccagcactgggtaatcttttcaac  
 NY1 gttttattccaatcaaactgcatatacagcaacctgccagcactgggtaatcttttcaac  
 \*\*\*\*\*

NP1 atgcagaattctttgtttacatcacgtgatgcttctccacgtggccactgagtcgcaaca  
 NY1 atgcagaattctttgtttacatcacgtgatgcttctccacgtggccactgagtcgcaaca  
 \*\*\*\*\*

NP1 caagctcaatttcaattttaatttaagttttgtgagagataatgacagaaataagtgttt  
 NY1 caagctcaatttcaatttcaatttaagttttgtgagagataatgacagaaataagtgttt  
 \*\*\*\*\*

NP1 ctggcatgagatgtaacttttgatttctatgattttcgcccatgtggtcactggaccgta  
 NY1 ctggcatgagatgtaacttttgatttctatgattttcgcccatgtggtcactggaccgta  
 \*\*\*\*\*

NP1 acggtttgaaaacatacaattcctatgaagtaaacatctggacgtattcttaatctgtg  
 NY1 acggtttgaaaacatacaattcctatgaagtaaacatctggacgtattcttaatctgtg  
 \*\*\*\*\*

NP1 gt  
 NY1 gt  
 \*\*
